# Supplementary material
Source: publisher figshare collection journal article supplement (https://adisjournals.figshare.com/ndownloader/files/36407817)
Supplement: Supplementary file 1 [file 36407817]

# Treatment Patterns for Targeted Therapies, Non-targeted Therapies, and Drug Holidays in Patients With Psoriasis

April W Armstrong, MD, MPH; Qian Xia, PhD; Anand Rojer John, B Tech; Vardhaman Patel, PhD, MS, B Pharm; Lauren Seigel, MS

## Key Findings: Psoriasis (PsO) treatment is cyclical

- Patients experience **frequent drug holidays** OR **transition back to targeted therapy (TT)** after using non-targeted therapy (NTT)
- For all patients on NTT, the **probability of reinitiating any TT** was **60.7%** at **24 months**
- **Real-world treatment patterns** in future **economic models** may provide **valuable insights**

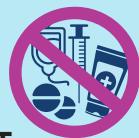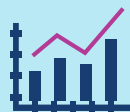

**Study Objective:** To evaluate US treatment patterns and, more specifically, switch patterns among patients with PsO who initiated treatment with TT and subsequently switched to another therapy

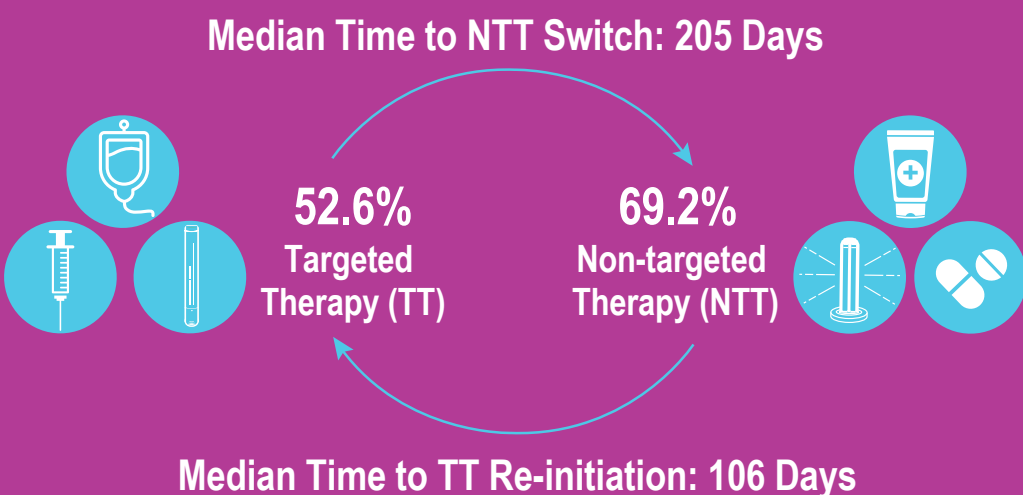

**Study Design:** Retrospective claims analysis using IBM® MarketScan® Commercial and Medicare Claims databases

**Patient Population:** Biologic- and apremilast-naïve patients with PsO (**11,526**)

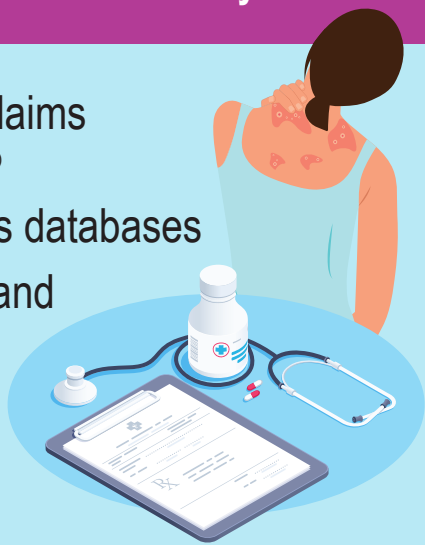

**Adis**

**OPEN ACCESS**

**PEER-REVIEWED FEATURE**

The graphical abstract represents the opinions of the authors. For a full list of declarations, including funding and author disclosure statements, please see the full text online. © The authors, CC-BY-NC 2022.
